# Supplementary material
Source: HighWire-hosted journal article supplement (https://bmjopenquality.bmj.com/highwire/filestream/136222/field_highwire_adjunct_files/0/ds2326.docx)
Supplement: ds2326.docx [file ds2326.docx]

| Are there three patient identifiers: Full name, date of birth, hospital number |
| --- |
| Is the job fully legible? |
| Is the patient background outlined? |
| Is the specific job outlined? |
| Are there clear instructions or a plan of action based on the job request? |
| Is it time specific? i.e day/degree of urgency |
| If job is a blood request-has a blood sticker been printed? |

**Figure 1: Scoring scheme used for the baseline data**

| **Weekend Date** | **10 – 12th November** | **15th – 16th December** | **22nd-23rd December** | **19th – 20th January** |
| --- | --- | --- | --- | --- |
|  | **%** | **%** | **%** | **%** |
| 3 Patient identifiers: Full Name, DOB, Hosp No. | **50** | **53** | **57** | **46** |
| Job fully legible | **100** | **78** | **91** | **82** |
| Patient background | **25** | **67** | **36** | **39** |
| Specific job outlined | **75** | **71** | **73** | **93** |
| Instruction/Plan based on job request | **0** | **64** | **55** | **54** |
| Time Specific, i.e day/degree of urgency | **100** | **89** | **89** | **93** |
| If job is a blood request-has a blood sticker been printed? | **75** | **93** | **86** |  |
| **Mean score as a percentage** | **60.7** | **73. 6** | **69.6** | **67.8** |

**Figure 2: Baseline data from the surgical wards**

| Weekend Date | **10th-12th November** | **15th-16th December** | **12th-13th January** | **19th-20th January** |
| --- | --- | --- | --- | --- |
|  | **%** | **%** | **%** | **%** |
| 3 Patient identifiers: Full Name, DOB, Hosp No. | **50** | **61** | **58** | **49** |
| List fully legible | **90** | **97** | **100** | **85** |
| Patient background | **60** | **95** | **82** | **62** |
| Specific job outlined | **60** | **82** | **93** | **72** |
| Instruction/Plan based on job request | **20** | **58** | **64** | **69** |
| Time Specific, i.e degree of urgency | **100** | **95** | **93** | **100** |
| If job is a blood request-has a blood sticker been printed? | **43** | **89** | **98** |  |
| **Mean score as a percentage** | **60.4** | **82.4** | **84** | **72.8** |

**Figure 3: Baseline data from the medical wards**
